# Supplementary material
Source: Royal Society of Chemistry journal article supplement (doi:10.1039/d5tb02880a)
Supplement: d5tb02880a1.pdf [file d5tb02880a1.pdf]

### Supplementary Material - Impact of 2'-fluoro nucleobase modifications on CD detection, sensitivity and specificity of short oligonucleotides bound to alginate hydrogels

Daisee K. Lubrin<sup>1</sup>, Colin I. Elliott<sup>1</sup>, Jean-Paul Desaulniers<sup>2</sup>, Theresa Stotesbury<sup>2\*</sup>.

<sup>1</sup>Applied Bioscience Graduate Program, Faculty of Science, Ontario Tech University, 2000 Simcoe St N, Oshawa, Ontario, L1G 0C5, Canada

<sup>2</sup> Faculty of Science Ontario Tech University, 2000 Simcoe St N, Oshawa, Ontario, L1G 0C5, Canada

\* Email: [theresa.stotesbury@ontariotechu.ca](mailto:theresa.stotesbury@ontariotechu.ca)

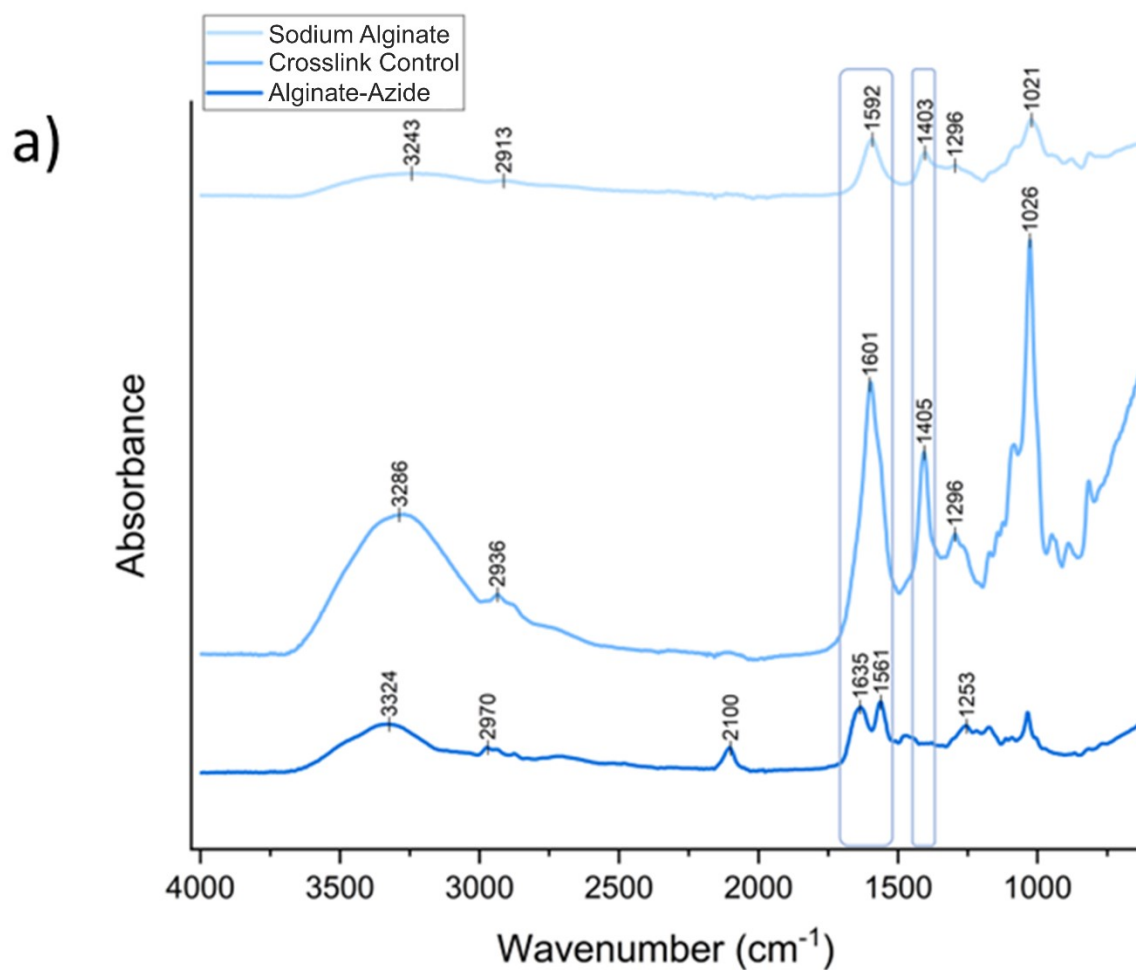

Figure S1. FTIR Spectra of sodium alginate, crosslink control and alginate-azide.

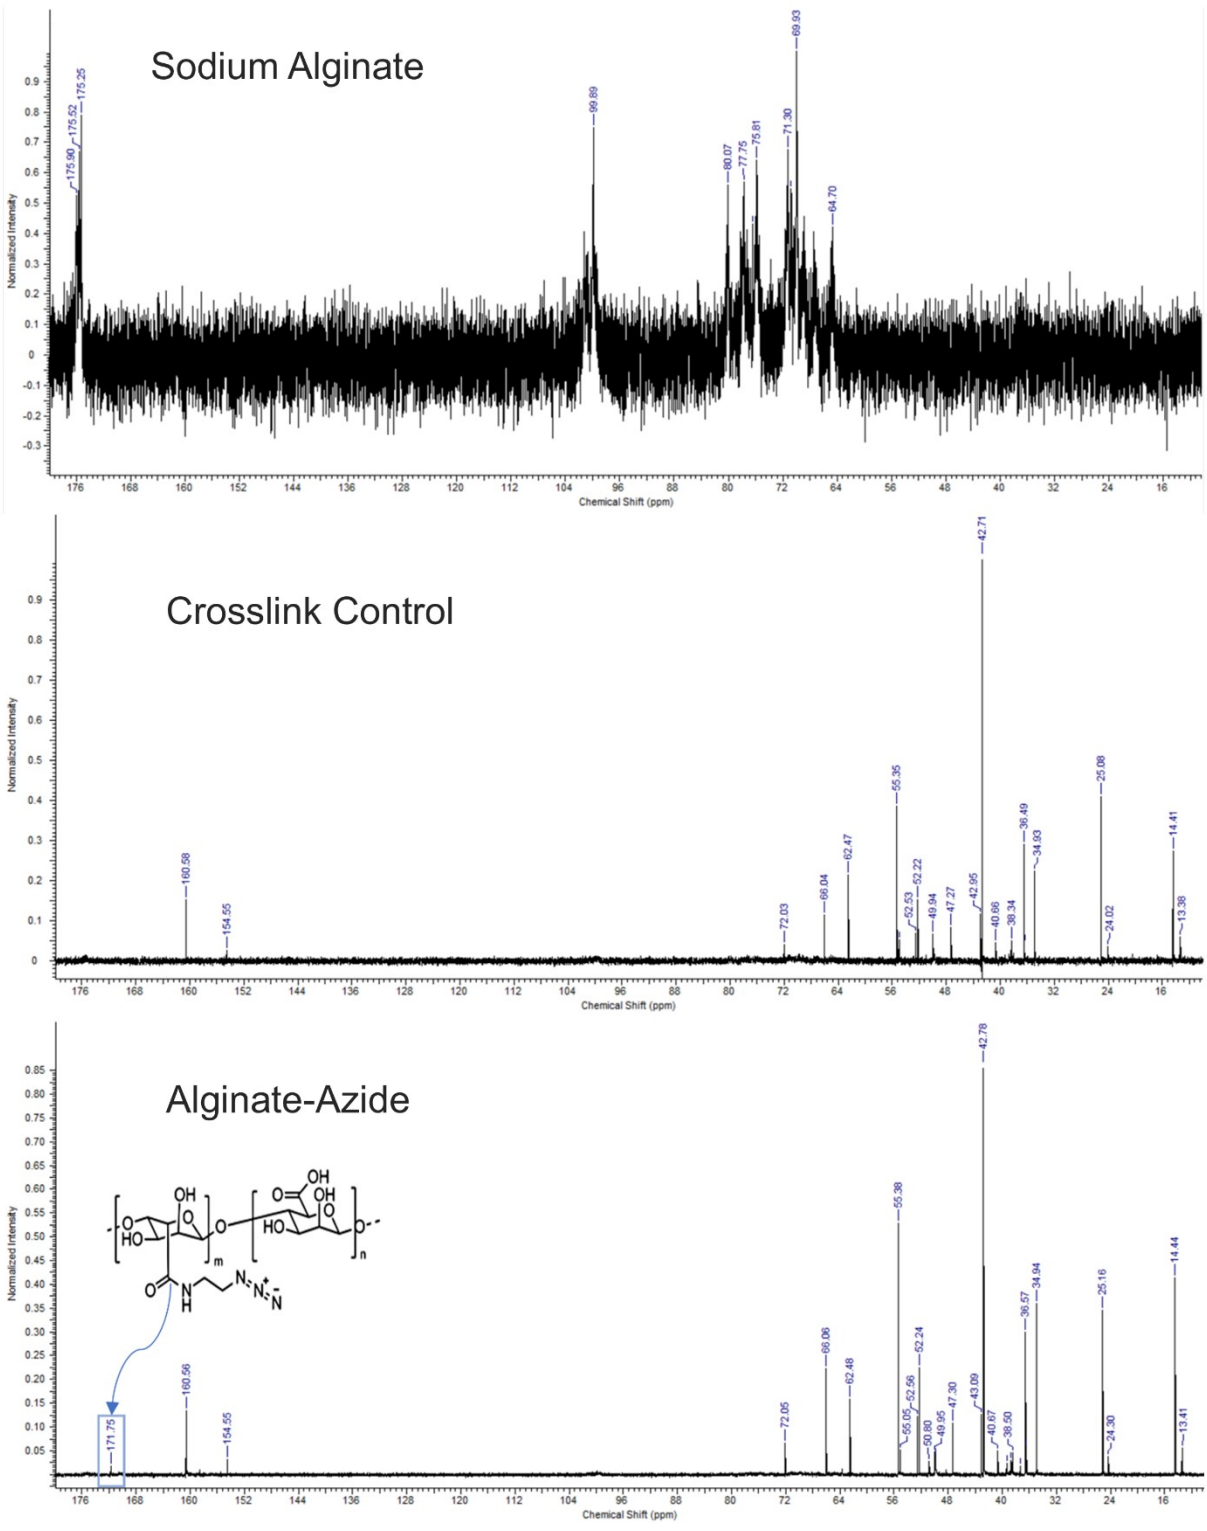

**Figure S2.** NMR Spectra of sodium alginate, crosslink control and alginate-azide.

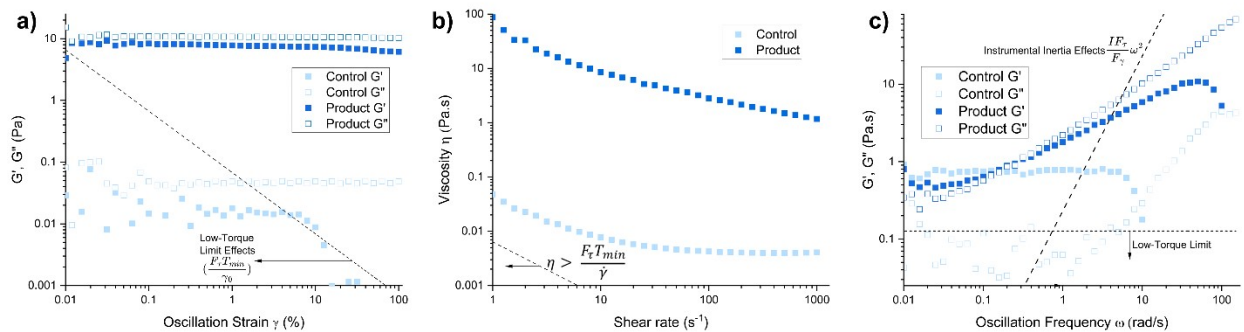

**Figure S3.** Amplitude, flow, and frequency sweeps of control and alginate-azide.

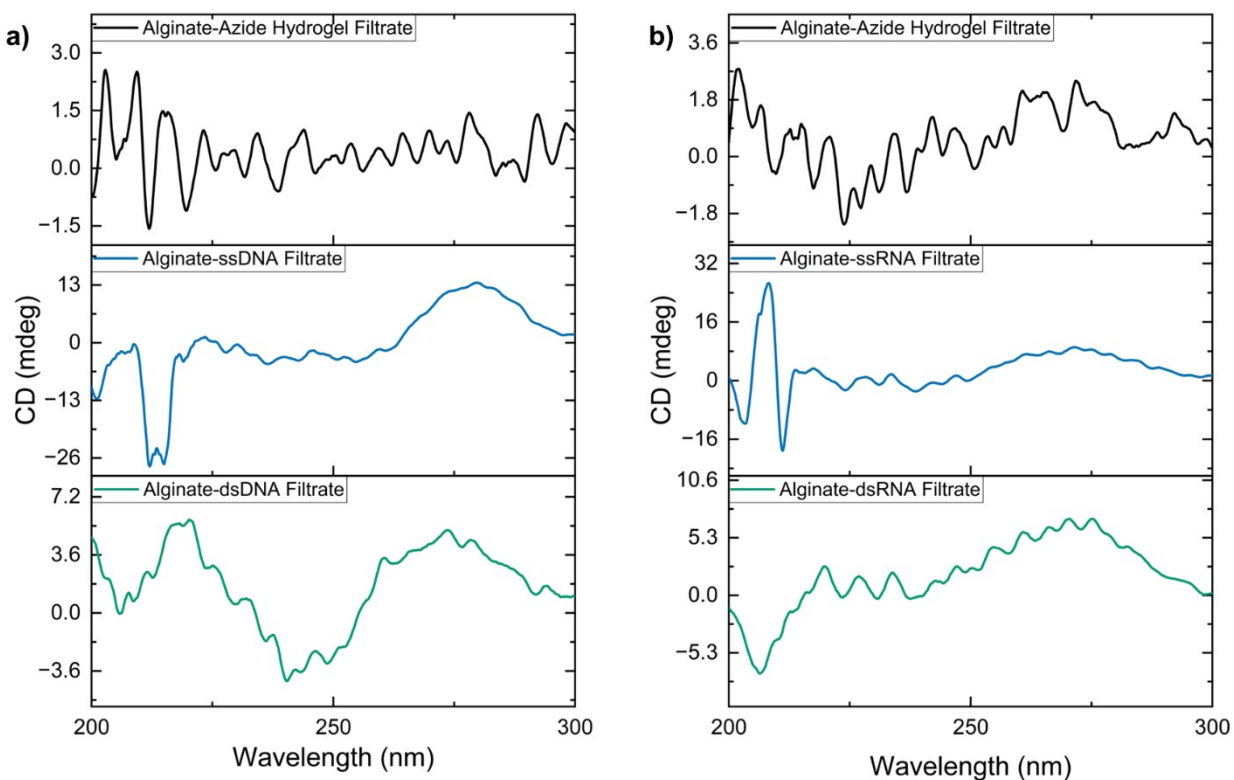

**Figure S4.** Example CD spectra from a) Alginate-azide, alginate-ssDNA, alginate-dsDNA, and b) Alginate-azide, alginate-ssRNA, alginate-dsRNA hydrogels collected from the filtrate post CuAAC reaction and post target sequence annealing.

**Table S1.** PCA Sample #s and their descriptions.

| PCA # | Sample Description                                                                                                        |
|-------|---------------------------------------------------------------------------------------------------------------------------|
| 4     | Alginate-ssDNA: 20 nmol (Probe)                                                                                           |
| 5     | Alginate-ssDNA: 20 nmol (Probe)                                                                                           |
| 6     | Alginate-ssDNA: 20 nmol (Probe)                                                                                           |
| 7     | Alginate-ssDNA: 20 nmol (Probe)                                                                                           |
| 8     | Alginate-ssDNA: 20 nmol (Probe)                                                                                           |
| 24    | Alginate-dsDNA: 1.25 nmol each (Probe + Target)                                                                           |
| 25    | Alginate-dsDNA: 1.25 nmol each (Probe + Target)                                                                           |
| 27    | Alginate-dsDNA: 20 nmol each (Probe + Target)                                                                             |
| 28    | Alginate-dsDNA: 20 nmol each (Probe + Target)                                                                             |
| 29    | Alginate-dsDNA: 20 nmol each (Probe + Target)                                                                             |
| 30    | Alginate-dsDNA: 20 nmol each (Probe + Target)                                                                             |
| 31    | Alginate-dsDNA: 20 nmol each (Probe + Target)                                                                             |
| 113   | Alginate-ssRNA: 20 nmol (Probe)                                                                                           |
| 114   | Alginate-ssRNA: 20 nmol (Probe)                                                                                           |
| 115   | Alginate-ssRNA: 20 nmol (Probe)                                                                                           |
| 116   | Alginate-ssRNA: 20 nmol (Probe)                                                                                           |
| 146   | Alginate-dsRNA: 20 nmol each (Probe + Target)                                                                             |
| 147   | Alginate-dsRNA: 20 nmol each (Probe + Target)                                                                             |
| 148   | Alginate-dsRNA: 20 nmol each (Probe + Target)                                                                             |
| 149   | Alginate-dsRNA: 20 nmol each (Probe + Target)                                                                             |
| 150   | Alginate-dsRNA: 20 nmol each (Probe + Target)                                                                             |
| 176   | Alginate-ssDNA: 10 nmol (Probe)                                                                                           |
| 177   | Alginate-ssDNA: 10 nmol (Probe)                                                                                           |
| 178   | Alginate-ssDNA: 10 nmol (Probe)                                                                                           |
| 179   | Alginate-ssDNA: 10 nmol (Probe)                                                                                           |
| 180   | Alginate-ssDNA: 10 nmol (Probe)                                                                                           |
| 223   | Alginate-dsDNA: 10 nmol each (Probe + Target)                                                                             |
| 224   | Alginate-dsDNA: 10 nmol each (Probe + Target)                                                                             |
| 225   | Alginate-dsDNA: 10 nmol each (Probe + Target)                                                                             |
| 226   | Alginate-dsDNA: 10 nmol each (Probe + Target)                                                                             |
| 227   | Alginate-dsDNA: 10 nmol each (Probe + Target)                                                                             |
| 234   | Alginate-dsDNA: 20 nmol each (Specificity Study: Probe + Mismatch (3) + Scrambled A + Scrambled B + Scrambled C + Target) |
| 235   | Alginate-dsDNA: 20 nmol each (Specificity Study: Probe + Mismatch (3) + Scrambled A + Scrambled B + Scrambled C + Target) |
| 236   | Alginate-dsDNA: 20 nmol each (Specificity Study: Probe + Mismatch (3) + Scrambled A + Scrambled B + Scrambled C + Target) |
| 237   | Alginate-dsDNA: 20 nmol each (Specificity Study: Probe + Mismatch (3) + Scrambled A + Scrambled B + Scrambled C)          |
| 238   | Alginate-dsDNA: 20 nmol each (Specificity Study: Probe + Mismatch (3) + Scrambled A + Scrambled B + Scrambled C)          |

|     |                                                                                                                  |
|-----|------------------------------------------------------------------------------------------------------------------|
| 239 | Alginate-dsDNA: 20 nmol each (Specificity Study: Probe + Mismatch (3) + Scrambled A + Scrambled B + Scrambled C) |
| 240 | Alginate-dsDNA: 20 nmol each (Specificity Study: Probe + Mismatch (3) + Scrambled A)                             |
| 241 | Alginate-dsDNA: 20 nmol each (Specificity Study: Probe + Mismatch (3) + Scrambled A)                             |
| 242 | Alginate-dsDNA: 20 nmol each (Specificity Study: Probe + Mismatch (3) + Scrambled A)                             |
| 243 | Alginate-dsDNA: 20 nmol each (Specificity Study: Probe + Mismatch (3) + Scrambled A + Target)                    |
| 244 | Alginate-dsDNA: 20 nmol each (Specificity Study: Probe + Mismatch (3) + Scrambled A + Target)                    |
| 245 | Alginate-dsDNA: 20 nmol each (Specificity Study: Probe + Mismatch (3) + Scrambled A + Target)                    |
| 291 | Alginate-dsDNA: 20 nmol each (Specificity Study: Probe + Scrambled B + Target)                                   |
| 292 | Alginate-dsDNA: 20 nmol each (Specificity Study: Probe + Scrambled B + Target)                                   |
| 293 | Alginate-dsDNA: 20 nmol each (Specificity Study: Probe + Scrambled B + Target)                                   |
| 294 | Alginate-dsDNA: 20 nmol each (Specificity Study: Probe + Scrambled B)                                            |
| 295 | Alginate-dsDNA: 20 nmol each (Specificity Study: Probe + Scrambled B)                                            |
| 296 | Alginate-dsDNA: 20 nmol each (Specificity Study: Probe + Scrambled B)                                            |
| 297 | Alginate-dsDNA: 20 nmol each (Specificity Study: Probe + Scrambled C + Target)                                   |
| 298 | Alginate-dsDNA: 20 nmol each (Specificity Study: Probe + Scrambled C + Target)                                   |
| 299 | Alginate-dsDNA: 20 nmol each (Specificity Study: Probe + Scrambled C + Target)                                   |
| 300 | Alginate-dsDNA: 20 nmol each (Specificity Study: Probe + Scrambled C)                                            |
| 301 | Alginate-dsDNA: 20 nmol each (Specificity Study: Probe + Scrambled C)                                            |
| 302 | Alginate-dsDNA: 20 nmol each (Specificity Study: Probe + Scrambled C)                                            |
| 303 | Alginate-dsDNA: 20 nmol each (Specificity Study: Probe + Mismatch (3) + Target)                                  |
| 304 | Alginate-dsDNA: 20 nmol each (Specificity Study: Probe + Mismatch (3) + Target)                                  |
| 305 | Alginate-dsDNA: 20 nmol each (Specificity Study: Probe + Mismatch (3) + Target)                                  |
| 309 | Alginate-dsDNA: 20 nmol each (Specificity Study: Probe + Scrambled A + Target)                                   |
| 310 | Alginate-dsDNA: 20 nmol each (Specificity Study: Probe + Scrambled A + Target)                                   |
| 311 | Alginate-dsDNA: 20 nmol each (Specificity Study: Probe + Scrambled A + Target)                                   |
| 315 | Alginate-dsDNA: 20 nmol each (Specificity Study: Probe + Scrambled B + Scrambled C + Target)                     |
| 316 | Alginate-dsDNA: 20 nmol each (Specificity Study: Probe + Scrambled B + Scrambled C + Target)                     |
| 317 | Alginate-dsDNA: 20 nmol each (Specificity Study: Probe + Scrambled B + Scrambled C + Target)                     |
| 318 | Alginate-dsDNA: 20 nmol each (Specificity Study: Probe + Scrambled A + Scrambled B + Scrambled C + Target)       |
| 319 | Alginate-dsDNA: 20 nmol each (Specificity Study: Probe + Scrambled A + Scrambled B + Scrambled C + Target)       |
| 320 | Alginate-dsDNA: 20 nmol each (Specificity Study: Probe + Scrambled A + Scrambled B + Scrambled C + Target)       |
| 322 | Alginate-dsDNA: 20 nmol each (Specificity Study: Probe + Scrambled A + Scrambled B + Scrambled C)                |
| 323 | Alginate-dsDNA: 20 nmol each (Specificity Study: Probe + Scrambled A + Scrambled                                 |

|     |                                                                                     |
|-----|-------------------------------------------------------------------------------------|
|     | B + Scrambled C)                                                                    |
| 324 | Alginate-dsDNA: 20 nmol each (Specificity Study: Probe + Scrambled B + Scrambled C) |
| 325 | Alginate-dsDNA: 20 nmol each (Specificity Study: Probe + Scrambled B + Scrambled C) |
| 326 | Alginate-dsDNA: 20 nmol each (Specificity Study: Probe + Scrambled B + Scrambled C) |
| 327 | Alginate-ssDNA: 20 nmol (Specificity Study: Probe)                                  |
| 328 | Alginate-ssDNA: 20 nmol (Specificity Study: Probe)                                  |
| 329 | Alginate-dsDNA: 20 nmol each (Specificity Study: Probe + Mismatch (3))              |
| 330 | Alginate-dsDNA: 20 nmol each (Specificity Study: Probe + Mismatch (3))              |
| 331 | Alginate-dsDNA: 20 nmol each (Specificity Study: Probe + Mismatch (3))              |
| 332 | Alginate-dsDNA: 20 nmol each (Specificity Study: Probe + Scrambled A)               |
| 333 | Alginate-dsDNA: 20 nmol each (Specificity Study: Probe + Scrambled A)               |
| 334 | Alginate-dsDNA: 20 nmol each (Specificity Study: Probe + Scrambled A)               |
| 622 | Alginate-ds2'-F Oligo (F All DNA): 20 nmol each (Probe + Target)                    |
| 623 | Alginate-ss2'-F Oligo (F All RNA): 5 nmol (Probe)                                   |
| 624 | Alginate-ss2'-F Oligo (F All RNA): 5 nmol (Probe)                                   |
| 625 | Alginate-ss2'-F Oligo (F All RNA): 10 nmol (Probe)                                  |
| 626 | Alginate-ss2'-F Oligo (F All RNA): 10 nmol (Probe)                                  |
| 627 | Alginate-ss2'-F Oligo (F All RNA): 10 nmol (Probe)                                  |
| 628 | Alginate-ss2'-F Oligo (F All RNA): 20 nmol (Probe)                                  |
| 629 | Alginate-ss2'-F Oligo (F All RNA): 20 nmol (Probe)                                  |
| 630 | Alginate-ss2'-F Oligo (F All RNA): 20 nmol (Probe)                                  |
| 640 | Alginate-ds2'-F Oligo (F All RNA): 5 nmol each (Probe + Target)                     |
| 641 | Alginate-ds2'-F Oligo (F All RNA): 5 nmol each (Probe + Target)                     |
| 642 | Alginate-ds2'-F Oligo (F All RNA): 5 nmol each (Probe + Target)                     |
| 643 | Alginate-ds2'-F Oligo (F All RNA): 10 nmol each (Probe + Target)                    |
| 644 | Alginate-ds2'-F Oligo (F All RNA): 10 nmol each (Probe + Target)                    |
| 645 | Alginate-ds2'-F Oligo (F All RNA): 10 nmol each (Probe + Target)                    |
| 646 | Alginate-ds2'-F Oligo (F All RNA): 20 nmol each (Probe + Target)                    |
| 647 | Alginate-ds2'-F Oligo (F All RNA): 20 nmol each (Probe + Target)                    |
| 648 | Alginate-ds2'-F Oligo (F All RNA): 20 nmol each (Probe + Target)                    |
| 694 | Alginate-ss2'-F Oligo (F All DNA): 5 nmol (Probe)                                   |
| 695 | Alginate-ss2'-F Oligo (F All DNA): 5 nmol (Probe)                                   |
| 696 | Alginate-ss2'-F Oligo (F All DNA): 5 nmol (Probe)                                   |
| 697 | Alginate-ss2'-F Oligo (F All DNA): 10 nmol (Probe)                                  |
| 698 | Alginate-ss2'-F Oligo (F All DNA): 10 nmol (Probe)                                  |
| 699 | Alginate-ss2'-F Oligo (F All DNA): 10 nmol (Probe)                                  |
| 700 | Alginate-ss2'-F Oligo (F All DNA): 20 nmol (Probe)                                  |
| 701 | Alginate-ss2'-F Oligo (F All DNA): 20 nmol (Probe)                                  |
| 702 | Alginate-ss2'-F Oligo (F All DNA): 20 nmol (Probe)                                  |
| 712 | Alginate-ds2'-F Oligo (F All DNA): 5 nmol each (Probe + Target)                     |
| 713 | Alginate-ds2'-F Oligo (F All DNA): 5 nmol each (Probe + Target)                     |

|     |                                                                  |
|-----|------------------------------------------------------------------|
| 714 | Alginate-ds2'-F Oligo (F All DNA): 5 nmol each (Probe + Target)  |
| 715 | Alginate-ds2'-F Oligo (F All DNA): 10 nmol each (Probe + Target) |
| 716 | Alginate-ds2'-F Oligo (F All DNA): 10 nmol each (Probe + Target) |
| 717 | Alginate-ds2'-F Oligo (F All DNA): 10 nmol each (Probe + Target) |
| 718 | Alginate-ds2'-F Oligo (F All DNA): 20 nmol each (Probe + Target) |
| 719 | Alginate-ds2'-F Oligo (F All DNA): 20 nmol each (Probe + Target) |
| 729 | Alginate-ssRNA: 5 nmol (Probe)                                   |
| 730 | Alginate-ssRNA: 5 nmol (Probe)                                   |
| 731 | Alginate-ssRNA: 5 nmol (Probe)                                   |
| 732 | Alginate-ssRNA: 10 nmol (Probe)                                  |
| 733 | Alginate-ssRNA: 10 nmol (Probe)                                  |
| 734 | Alginate-ssRNA: 10 nmol (Probe)                                  |
| 735 | Alginate-ssRNA: 20 nmol (Probe)                                  |
| 736 | Alginate-ssRNA: 20 nmol (Probe)                                  |
| 737 | Alginate-ssRNA: 20 nmol (Probe)                                  |
| 747 | Alginate-dsRNA: 5 nmol each (Probe + Target)                     |
| 748 | Alginate-dsRNA: 5 nmol each (Probe + Target)                     |
| 749 | Alginate-dsRNA: 5 nmol each (Probe + Target)                     |
| 750 | Alginate-dsRNA: 10 nmol each (Probe + Target)                    |
| 751 | Alginate-dsRNA: 10 nmol each (Probe + Target)                    |
| 752 | Alginate-dsRNA: 10 nmol each (Probe + Target)                    |
| 753 | Alginate-dsRNA: 20 nmol each (Probe + Target)                    |
| 754 | Alginate-dsRNA: 20 nmol each (Probe + Target)                    |
| 755 | Alginate-dsRNA: 20 nmol each (Probe + Target)                    |
| 756 | Alginate-ssDNA: 10 nmol (Probe)                                  |
| 757 | Alginate-ssDNA: 10 nmol (Probe)                                  |
| 758 | Alginate-ssDNA: 10 nmol (Probe)                                  |
| 759 | Alginate-ssDNA: 10 nmol (Probe)                                  |
| 760 | Alginate-ssDNA: 10 nmol (Probe)                                  |
| 761 | Alginate-ssDNA: 10 nmol (Probe)                                  |
| 762 | Alginate-ssDNA: 10 nmol (Probe)                                  |
| 763 | Alginate-ssDNA: 10 nmol (Probe)                                  |
| 764 | Alginate-ssDNA: 10 nmol (Probe)                                  |
| 765 | Alginate-ssDNA: 10 nmol (Probe)                                  |
| 766 | Alginate-ssDNA: 10 nmol (Probe)                                  |
| 767 | Alginate-ssDNA: 10 nmol (Probe)                                  |
| 768 | Alginate-ssDNA: 10 nmol (Probe)                                  |
| 769 | Alginate-ssDNA: 10 nmol (Probe)                                  |
| 770 | Alginate-ssDNA: 10 nmol (Probe)                                  |
| 771 | Alginate-ssDNA: 10 nmol (Probe)                                  |
| 772 | Alginate-ssDNA: 10 nmol (Probe)                                  |
| 773 | Alginate-ssDNA: 10 nmol (Probe)                                  |
| 777 | Alginate-dsDNA: 10 nmol Probe + 1.25 nmol Target                 |

|     |                                                                     |
|-----|---------------------------------------------------------------------|
| 778 | Alginate-dsDNA: 10 nmol Probe + 1.25 nmol Target                    |
| 779 | Alginate-dsDNA: 10 nmol Probe + 1.25 nmol Target                    |
| 780 | Alginate-dsDNA: 10 nmol Probe + 2.5 nmol Target                     |
| 781 | Alginate-dsDNA: 10 nmol Probe + 2.5 nmol Target                     |
| 782 | Alginate-dsDNA: 10 nmol Probe + 2.5 nmol Target                     |
| 783 | Alginate-dsDNA: 10 nmol Probe + 5 nmol Target                       |
| 784 | Alginate-dsDNA: 10 nmol Probe + 5 nmol Target                       |
| 785 | Alginate-dsDNA: 10 nmol Probe + 5 nmol Target                       |
| 786 | Alginate-dsDNA: 10 nmol Probe + 10 nmol Target                      |
| 787 | Alginate-dsDNA: 10 nmol Probe + 10 nmol Target                      |
| 788 | Alginate-dsDNA: 10 nmol Probe + 10 nmol Target                      |
| 789 | Alginate-dsDNA: 10 nmol Probe + 20 nmol Target                      |
| 790 | Alginate-dsDNA: 10 nmol Probe + 20 nmol Target                      |
| 791 | Alginate-dsDNA: 10 nmol Probe + 20 nmol Target                      |
| 792 | Alginate-ss2'-F Oligo (F All DNA): 10 nmol (Probe)                  |
| 793 | Alginate-ss2'-F Oligo (F All DNA): 10 nmol (Probe)                  |
| 794 | Alginate-ss2'-F Oligo (F All DNA): 10 nmol (Probe)                  |
| 795 | Alginate-ss2'-F Oligo (F All DNA): 10 nmol (Probe)                  |
| 796 | Alginate-ss2'-F Oligo (F All DNA): 10 nmol (Probe)                  |
| 797 | Alginate-ss2'-F Oligo (F All DNA): 10 nmol (Probe)                  |
| 798 | Alginate-ss2'-F Oligo (F All DNA): 10 nmol (Probe)                  |
| 799 | Alginate-ss2'-F Oligo (F All DNA): 10 nmol (Probe)                  |
| 800 | Alginate-ss2'-F Oligo (F All DNA): 10 nmol (Probe)                  |
| 801 | Alginate-ss2'-F Oligo (F All DNA): 10 nmol (Probe)                  |
| 802 | Alginate-ss2'-F Oligo (F All DNA): 10 nmol (Probe)                  |
| 803 | Alginate-ss2'-F Oligo (F All DNA): 10 nmol (Probe)                  |
| 804 | Alginate-ss2'-F Oligo (F All DNA): 10 nmol (Probe)                  |
| 805 | Alginate-ss2'-F Oligo (F All DNA): 10 nmol (Probe)                  |
| 806 | Alginate-ss2'-F Oligo (F All DNA): 10 nmol (Probe)                  |
| 807 | Alginate-ss2'-F Oligo (F All DNA): 10 nmol (Probe)                  |
| 808 | Alginate-ss2'-F Oligo (F All DNA): 10 nmol (Probe)                  |
| 809 | Alginate-ss2'-F Oligo (F All DNA): 10 nmol (Probe)                  |
| 813 | Alginate-ds2'-F Oligo (F All DNA): 10 nmol Probe + 1.25 nmol Target |
| 814 | Alginate-ds2'-F Oligo (F All DNA): 10 nmol Probe + 1.25 nmol Target |
| 815 | Alginate-ds2'-F Oligo (F All DNA): 10 nmol Probe + 1.25 nmol Target |
| 816 | Alginate-ds2'-F Oligo (F All DNA): 10 nmol Probe + 2.5 nmol Target  |
| 817 | Alginate-ds2'-F Oligo (F All DNA): 10 nmol Probe + 2.5 nmol Target  |
| 818 | Alginate-ds2'-F Oligo (F All DNA): 10 nmol Probe + 2.5 nmol Target  |
| 819 | Alginate-ds2'-F Oligo (F All DNA): 10 nmol Probe + 5 nmol Target    |
| 820 | Alginate-ds2'-F Oligo (F All DNA): 10 nmol Probe + 5 nmol Target    |
| 821 | Alginate-ds2'-F Oligo (F All DNA): 10 nmol Probe + 5 nmol Target    |
| 822 | Alginate-ds2'-F Oligo (F All DNA): 10 nmol Probe + 10 nmol Target   |
| 823 | Alginate-ds2'-F Oligo (F All DNA): 10 nmol Probe + 10 nmol Target   |

|     |                                                                   |
|-----|-------------------------------------------------------------------|
| 824 | Alginate-ds2'-F Oligo (F All DNA): 10 nmol Probe + 10 nmol Target |
| 825 | Alginate-ds2'-F Oligo (F All DNA): 10 nmol Probe + 20 nmol Target |
| 826 | Alginate-ds2'-F Oligo (F All DNA): 10 nmol Probe + 20 nmol Target |
| 827 | Alginate-ds2'-F Oligo (F All DNA): 10 nmol Probe + 20 nmol Target |
| 828 | Alginate-ssRNA: 10 nmol (Probe)                                   |
| 829 | Alginate-ssRNA: 10 nmol (Probe)                                   |
| 830 | Alginate-ssRNA: 10 nmol (Probe)                                   |
| 831 | Alginate-ssRNA: 10 nmol (Probe)                                   |
| 832 | Alginate-ssRNA: 10 nmol (Probe)                                   |
| 833 | Alginate-ssRNA: 10 nmol (Probe)                                   |
| 834 | Alginate-ssRNA: 10 nmol (Probe)                                   |
| 835 | Alginate-ssRNA: 10 nmol (Probe)                                   |
| 836 | Alginate-ssRNA: 10 nmol (Probe)                                   |
| 837 | Alginate-ssRNA: 10 nmol (Probe)                                   |
| 838 | Alginate-ssRNA: 10 nmol (Probe)                                   |
| 839 | Alginate-ssRNA: 10 nmol (Probe)                                   |
| 840 | Alginate-ssRNA: 10 nmol (Probe)                                   |
| 841 | Alginate-ssRNA: 10 nmol (Probe)                                   |
| 842 | Alginate-ssRNA: 10 nmol (Probe)                                   |
| 843 | Alginate-ssRNA: 10 nmol (Probe)                                   |
| 844 | Alginate-ssRNA: 10 nmol (Probe)                                   |
| 845 | Alginate-ssRNA: 10 nmol (Probe)                                   |
| 849 | Alginate-dsRNA: 10 nmol Probe + 1.25 nmol Target                  |
| 850 | Alginate-dsRNA: 10 nmol Probe + 1.25 nmol Target                  |
| 851 | Alginate-dsRNA: 10 nmol Probe + 1.25 nmol Target                  |
| 852 | Alginate-dsRNA: 10 nmol Probe + 2.5 nmol Target                   |
| 853 | Alginate-dsRNA: 10 nmol Probe + 2.5 nmol Target                   |
| 854 | Alginate-dsRNA: 10 nmol Probe + 2.5 nmol Target                   |
| 855 | Alginate-dsRNA: 10 nmol Probe + 5 nmol Target                     |
| 856 | Alginate-dsRNA: 10 nmol Probe + 5 nmol Target                     |
| 857 | Alginate-dsRNA: 10 nmol Probe + 5 nmol Target                     |
| 858 | Alginate-dsRNA: 10 nmol Probe + 10 nmol Target                    |
| 859 | Alginate-dsRNA: 10 nmol Probe + 10 nmol Target                    |
| 860 | Alginate-dsRNA: 10 nmol Probe + 10 nmol Target                    |
| 861 | Alginate-dsRNA: 10 nmol Probe + 20 nmol Target                    |
| 862 | Alginate-dsRNA: 10 nmol Probe + 20 nmol Target                    |
| 863 | Alginate-dsRNA: 10 nmol Probe + 20 nmol Target                    |
| 864 | Alginate-ss2'-F Oligo (F All RNA): 10 nmol (Probe)                |
| 865 | Alginate-ss2'-F Oligo (F All RNA): 10 nmol (Probe)                |
| 866 | Alginate-ss2'-F Oligo (F All RNA): 10 nmol (Probe)                |
| 867 | Alginate-ss2'-F Oligo (F All RNA): 10 nmol (Probe)                |
| 868 | Alginate-ss2'-F Oligo (F All RNA): 10 nmol (Probe)                |
| 869 | Alginate-ss2'-F Oligo (F All RNA): 10 nmol (Probe)                |

|     |                                                                                                    |
|-----|----------------------------------------------------------------------------------------------------|
| 870 | Alginate-ss2'-F Oligo (F All RNA): 10 nmol (Probe)                                                 |
| 871 | Alginate-ss2'-F Oligo (F All RNA): 10 nmol (Probe)                                                 |
| 872 | Alginate-ss2'-F Oligo (F All RNA): 10 nmol (Probe)                                                 |
| 873 | Alginate-ss2'-F Oligo (F All RNA): 10 nmol (Probe)                                                 |
| 874 | Alginate-ss2'-F Oligo (F All RNA): 10 nmol (Probe)                                                 |
| 875 | Alginate-ss2'-F Oligo (F All RNA): 10 nmol (Probe)                                                 |
| 876 | Alginate-ss2'-F Oligo (F All RNA): 10 nmol (Probe)                                                 |
| 877 | Alginate-ss2'-F Oligo (F All RNA): 10 nmol (Probe)                                                 |
| 878 | Alginate-ss2'-F Oligo (F All RNA): 10 nmol (Probe)                                                 |
| 879 | Alginate-ss2'-F Oligo (F All RNA): 10 nmol (Probe)                                                 |
| 880 | Alginate-ss2'-F Oligo (F All RNA): 10 nmol (Probe)                                                 |
| 881 | Alginate-ss2'-F Oligo (F All RNA): 10 nmol (Probe)                                                 |
| 885 | Alginate-ds2'-F Oligo (F All RNA): 10 nmol Probe + 1.25 nmol Target                                |
| 886 | Alginate-ds2'-F Oligo (F All RNA): 10 nmol Probe + 1.25 nmol Target                                |
| 887 | Alginate-ds2'-F Oligo (F All RNA): 10 nmol Probe + 1.25 nmol Target                                |
| 888 | Alginate-ds2'-F Oligo (F All RNA): 10 nmol Probe + 2.5 nmol Target                                 |
| 889 | Alginate-ds2'-F Oligo (F All RNA): 10 nmol Probe + 2.5 nmol Target                                 |
| 890 | Alginate-ds2'-F Oligo (F All RNA): 10 nmol Probe + 2.5 nmol Target                                 |
| 891 | Alginate-ds2'-F Oligo (F All RNA): 10 nmol Probe + 5 nmol Target                                   |
| 892 | Alginate-ds2'-F Oligo (F All RNA): 10 nmol Probe + 5 nmol Target                                   |
| 893 | Alginate-ds2'-F Oligo (F All RNA): 10 nmol Probe + 5 nmol Target                                   |
| 894 | Alginate-ds2'-F Oligo (F All RNA): 10 nmol Probe + 10 nmol Target                                  |
| 895 | Alginate-ds2'-F Oligo (F All RNA): 10 nmol Probe + 10 nmol Target                                  |
| 896 | Alginate-ds2'-F Oligo (F All RNA): 10 nmol Probe + 10 nmol Target                                  |
| 897 | Alginate-ds2'-F Oligo (F All RNA): 10 nmol Probe + 20 nmol Target                                  |
| 898 | Alginate-ds2'-F Oligo (F All RNA): 10 nmol Probe + 20 nmol Target                                  |
| 899 | Alginate-ds2'-F Oligo (F All RNA): 10 nmol Probe + 20 nmol Target                                  |
| 951 | Alginate-ds2'-F Oligo (F All DNA): 10 nmol each (Specificity Study: Probe + Target)                |
| 952 | Alginate-ds2'-F Oligo (F All DNA): 10 nmol each (Specificity Study: Probe + Target)                |
| 953 | Alginate-ds2'-F Oligo (F All DNA): 10 nmol each (Specificity Study: Probe + Target)                |
| 954 | Alginate-ds2'-F Oligo (F All DNA): 10 nmol each (Specificity Study: Probe + Mismatch (3))          |
| 955 | Alginate-ds2'-F Oligo (F All DNA): 10 nmol each (Specificity Study: Probe + Mismatch (3))          |
| 956 | Alginate-ds2'-F Oligo (F All DNA): 10 nmol each (Specificity Study: Probe + Mismatch (3))          |
| 957 | Alginate-ds2'-F Oligo (F All DNA): 10 nmol each (Specificity Study: Probe + Mismatch (3) + Target) |
| 958 | Alginate-ds2'-F Oligo (F All DNA): 10 nmol each (Specificity Study: Probe + Mismatch (3) + Target) |
| 959 | Alginate-ds2'-F Oligo (F All DNA): 10 nmol each (Specificity Study: Probe + Mismatch (3) + Target) |
| 960 | Alginate-ds2'-F Oligo (F All DNA): 10 nmol each (Specificity Study: Probe + Scrambled A)           |
| 961 | Alginate-ds2'-F Oligo (F All DNA): 10 nmol each (Specificity Study: Probe +                        |

|     |                                                                                                                      |
|-----|----------------------------------------------------------------------------------------------------------------------|
|     | Scrambled A)                                                                                                         |
| 962 | Alginate-ds2'-F Oligo (F All DNA): 10 nmol each (Specificity Study: Probe + Scrambled A)                             |
| 963 | Alginate-ds2'-F Oligo (F All DNA): 10 nmol each (Specificity Study: Probe + Scrambled A + Target)                    |
| 964 | Alginate-ds2'-F Oligo (F All DNA): 10 nmol each (Specificity Study: Probe + Scrambled A + Target)                    |
| 965 | Alginate-ds2'-F Oligo (F All DNA): 10 nmol each (Specificity Study: Probe + Scrambled A + Target)                    |
| 966 | Alginate-ds2'-F Oligo (F All DNA): 10 nmol each (Specificity Study: Probe + Scrambled B)                             |
| 967 | Alginate-ds2'-F Oligo (F All DNA): 10 nmol each (Specificity Study: Probe + Scrambled B)                             |
| 968 | Alginate-ds2'-F Oligo (F All DNA): 10 nmol each (Specificity Study: Probe + Scrambled B)                             |
| 969 | Alginate-ds2'-F Oligo (F All DNA): 10 nmol each (Specificity Study: Probe + Scrambled B + Target)                    |
| 970 | Alginate-ds2'-F Oligo (F All DNA): 10 nmol each (Specificity Study: Probe + Scrambled B + Target)                    |
| 971 | Alginate-ds2'-F Oligo (F All DNA): 10 nmol each (Specificity Study: Probe + Scrambled B + Target)                    |
| 972 | Alginate-ds2'-F Oligo (F All DNA): 10 nmol each (Specificity Study: Probe + Scrambled C)                             |
| 973 | Alginate-ds2'-F Oligo (F All DNA): 10 nmol each (Specificity Study: Probe + Scrambled C)                             |
| 974 | Alginate-ds2'-F Oligo (F All DNA): 10 nmol each (Specificity Study: Probe + Scrambled C)                             |
| 975 | Alginate-ds2'-F Oligo (F All DNA): 10 nmol each (Specificity Study: Probe + Scrambled C + Target)                    |
| 976 | Alginate-ds2'-F Oligo (F All DNA): 10 nmol each (Specificity Study: Probe + Scrambled C + Target)                    |
| 977 | Alginate-ds2'-F Oligo (F All DNA): 10 nmol each (Specificity Study: Probe + Scrambled C + Target)                    |
| 978 | Alginate-ds2'-F Oligo (F All DNA): 10 nmol each (Specificity Study: Probe + Scrambled B + Scrambled C)               |
| 979 | Alginate-ds2'-F Oligo (F All DNA): 10 nmol each (Specificity Study: Probe + Scrambled B + Scrambled C)               |
| 980 | Alginate-ds2'-F Oligo (F All DNA): 10 nmol each (Specificity Study: Probe + Scrambled B + Scrambled C)               |
| 981 | Alginate-ds2'-F Oligo (F All DNA): 10 nmol each (Specificity Study: Probe + Scrambled B + Scrambled C + Target)      |
| 982 | Alginate-ds2'-F Oligo (F All DNA): 10 nmol each (Specificity Study: Probe + Scrambled B + Scrambled C + Target)      |
| 983 | Alginate-ds2'-F Oligo (F All DNA): 10 nmol each (Specificity Study: Probe + Scrambled B + Scrambled C + Target)      |
| 984 | Alginate-ds2'-F Oligo (F All DNA): 10 nmol each (Specificity Study: Probe + Scrambled A + Scrambled B + Scrambled C) |
| 985 | Alginate-ds2'-F Oligo (F All DNA): 10 nmol each (Specificity Study: Probe + Scrambled A + Scrambled B + Scrambled C) |

|      |                                                                                                                                              |
|------|----------------------------------------------------------------------------------------------------------------------------------------------|
| 986  | Alginate-ds2'-F Oligo (F All DNA): 10 nmol each (Specificity Study: Probe + Scrambled A + Scrambled B + Scrambled C)                         |
| 987  | Alginate-ds2'-F Oligo (F All DNA): 10 nmol each (Specificity Study: Probe + Scrambled A + Scrambled B + Scrambled C + Target)                |
| 988  | Alginate-ds2'-F Oligo (F All DNA): 10 nmol each (Specificity Study: Probe + Scrambled A + Scrambled B + Scrambled C + Target)                |
| 989  | Alginate-ds2'-F Oligo (F All DNA): 10 nmol each (Specificity Study: Probe + Scrambled A + Scrambled B + Scrambled C + Target)                |
| 990  | Alginate-ds2'-F Oligo (F All DNA): 10 nmol each (Specificity Study: Probe + Mismatch (3) + Scrambled A)                                      |
| 991  | Alginate-ds2'-F Oligo (F All DNA): 10 nmol each (Specificity Study: Probe + Mismatch (3) + Scrambled A)                                      |
| 992  | Alginate-ds2'-F Oligo (F All DNA): 10 nmol each (Specificity Study: Probe + Mismatch (3) + Scrambled A)                                      |
| 993  | Alginate-ds2'-F Oligo (F All DNA): 10 nmol each (Specificity Study: Probe + Mismatch (3) + Scrambled A + Target)                             |
| 994  | Alginate-ds2'-F Oligo (F All DNA): 10 nmol each (Specificity Study: Probe + Mismatch (3) + Scrambled A + Target)                             |
| 995  | Alginate-ds2'-F Oligo (F All DNA): 10 nmol each (Specificity Study: Probe + Mismatch (3) + Scrambled A + Target)                             |
| 996  | Alginate-ds2'-F Oligo (F All DNA): 10 nmol each (Specificity Study: Probe + Mismatch (3) + Scrambled A + Scrambled B + Scrambled C)          |
| 997  | Alginate-ds2'-F Oligo (F All DNA): 10 nmol each (Specificity Study: Probe + Mismatch (3) + Scrambled A + Scrambled B + Scrambled C)          |
| 998  | Alginate-ds2'-F Oligo (F All DNA): 10 nmol each (Specificity Study: Probe + Mismatch (3) + Scrambled A + Scrambled B + Scrambled C)          |
| 999  | Alginate-ds2'-F Oligo (F All DNA): 10 nmol each (Specificity Study: Probe + Mismatch (3) + Scrambled A + Scrambled B + Scrambled C + Target) |
| 1000 | Alginate-ds2'-F Oligo (F All DNA): 10 nmol each (Specificity Study: Probe + Mismatch (3) + Scrambled A + Scrambled B + Scrambled C + Target) |
| 1001 | Alginate-ds2'-F Oligo (F All DNA): 10 nmol each (Specificity Study: Probe + Mismatch (3) + Scrambled A + Scrambled B + Scrambled C + Target) |
| 1029 | Alginate-dsDNA: 10 nmol each (Mismatch Determination Threshold: DNA Probe + DNA Target)                                                      |
| 1030 | Alginate-dsDNA: 10 nmol each (Mismatch Determination Threshold: DNA Probe + DNA Target)                                                      |
| 1031 | Alginate-dsDNA: 10 nmol each (Mismatch Determination Threshold: DNA Probe + DNA Target)                                                      |
| 1032 | Alginate-dsDNA: 10 nmol each (Mismatch Determination Threshold: DNA Probe + Mismatch (3))                                                    |
| 1033 | Alginate-dsDNA: 10 nmol each (Mismatch Determination Threshold: DNA Probe + Mismatch (3))                                                    |
| 1034 | Alginate-dsDNA: 10 nmol each (Mismatch Determination Threshold: DNA Probe + Mismatch (3))                                                    |
| 1035 | Alginate-dsDNA: 10 nmol each (Mismatch Determination Threshold: DNA Probe + Mismatch (3) + DNA Target)                                       |
| 1036 | Alginate-dsDNA: 10 nmol each (Mismatch Determination Threshold: DNA Probe + Mismatch (3) + DNA Target)                                       |
| 1037 | Alginate-dsDNA: 10 nmol each (Mismatch Determination Threshold: DNA Probe + Mismatch (3) + DNA Target)                                       |

|      |                                                                                                        |
|------|--------------------------------------------------------------------------------------------------------|
| 1038 | Alginate-dsDNA: 10 nmol each (Mismatch Determination Threshold: DNA Probe + Mismatch (5))              |
| 1039 | Alginate-dsDNA: 10 nmol each (Mismatch Determination Threshold: DNA Probe + Mismatch (5))              |
| 1040 | Alginate-dsDNA: 10 nmol each (Mismatch Determination Threshold: DNA Probe + Mismatch (5))              |
| 1041 | Alginate-dsDNA: 10 nmol each (Mismatch Determination Threshold: DNA Probe + Mismatch (5) + DNA Target) |
| 1042 | Alginate-dsDNA: 10 nmol each (Mismatch Determination Threshold: DNA Probe + Mismatch (5) + DNA Target) |
| 1043 | Alginate-dsDNA: 10 nmol each (Mismatch Determination Threshold: DNA Probe + Mismatch (5) + DNA Target) |
| 1044 | Alginate-dsDNA: 10 nmol each (Mismatch Determination Threshold: DNA Probe + Mismatch (7))              |
| 1045 | Alginate-dsDNA: 10 nmol each (Mismatch Determination Threshold: DNA Probe + Mismatch (7))              |
| 1046 | Alginate-dsDNA: 10 nmol each (Mismatch Determination Threshold: DNA Probe + Mismatch (7))              |
| 1047 | Alginate-dsDNA: 10 nmol each (Mismatch Determination Threshold: DNA Probe + Mismatch (7) + DNA Target) |
| 1048 | Alginate-dsDNA: 10 nmol each (Mismatch Determination Threshold: DNA Probe + Mismatch (7) + DNA Target) |
| 1049 | Alginate-dsDNA: 10 nmol each (Mismatch Determination Threshold: DNA Probe + Mismatch (7) + DNA Target) |
| 1050 | Alginate-dsDNA: 10 nmol each (Mismatch Determination Threshold: DNA Probe + Mismatch (9))              |
| 1051 | Alginate-dsDNA: 10 nmol each (Mismatch Determination Threshold: DNA Probe + Mismatch (9))              |
| 1052 | Alginate-dsDNA: 10 nmol each (Mismatch Determination Threshold: DNA Probe + Mismatch (9) + DNA Target) |
| 1053 | Alginate-dsDNA: 10 nmol each (Mismatch Determination Threshold: DNA Probe + Mismatch (9) + DNA Target) |
| 1054 | Alginate-dsDNA: 10 nmol each (Mismatch Determination Threshold: DNA Probe + Mismatch (9) + DNA Target) |

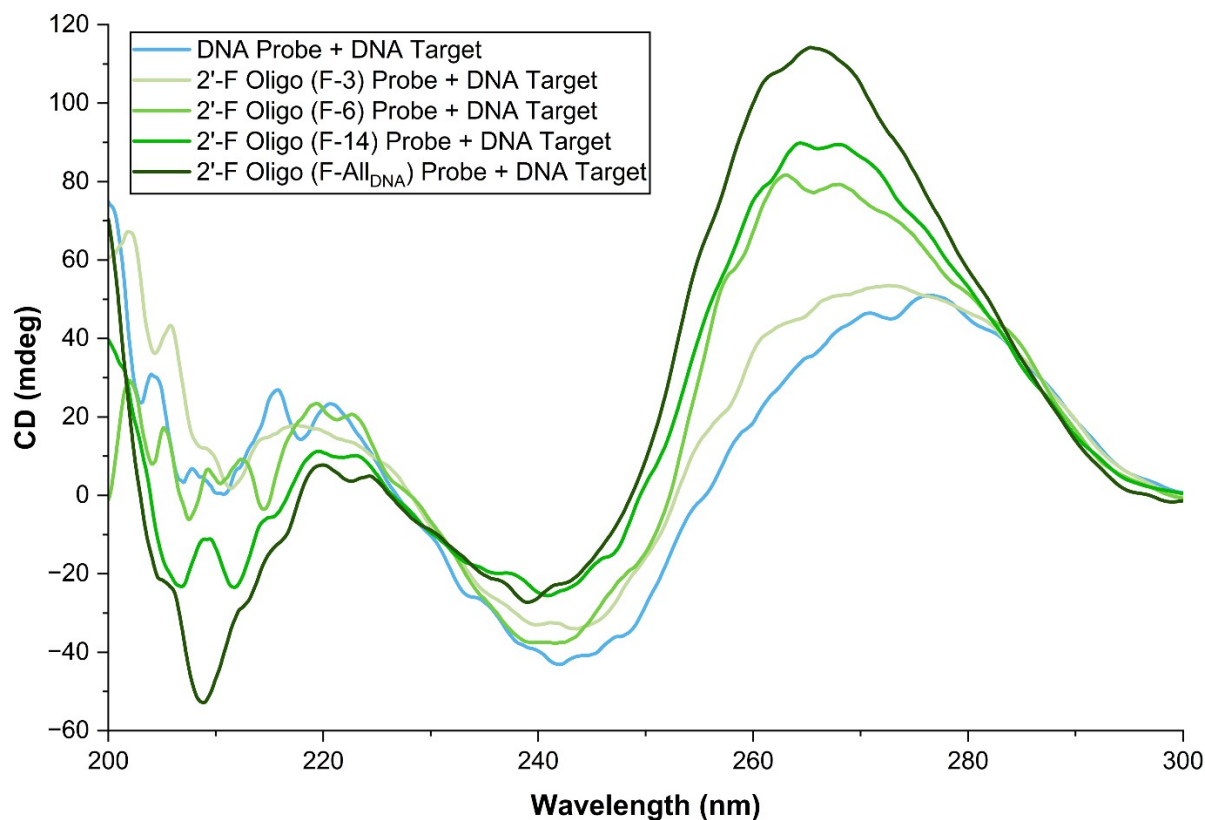

**Figure S5.** CD Spectra for duplexes of Unmodified DNA and 2'-F Oligo Probes bound to the DNA Target (not bound to alginate-azide).

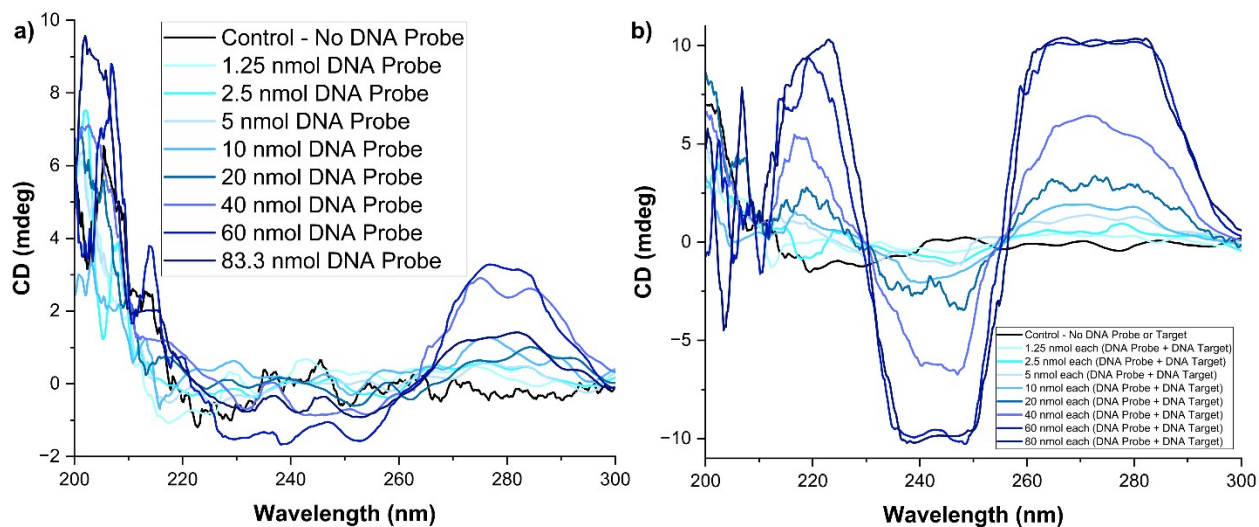

**Figure S6.** CD spectra for samples from Sensitivity Study I – Equal Molar Amounts of Probe and Target showing full range of concentrations tested (0-83.3 nmol) for a) ssDNA and b) dsDNA

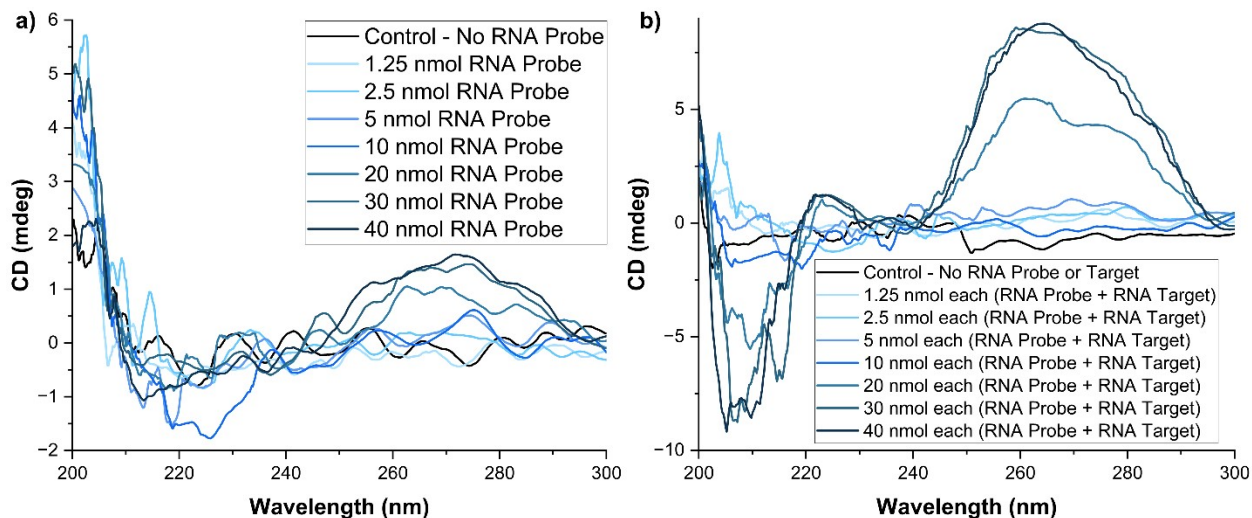

**Figure S7.** CD spectra for samples from Sensitivity Study I – Equal Molar Amounts of Probe and Target showing full range of concentrations tested (0-40 nmol) for a) ssRNA and b) dsRNA

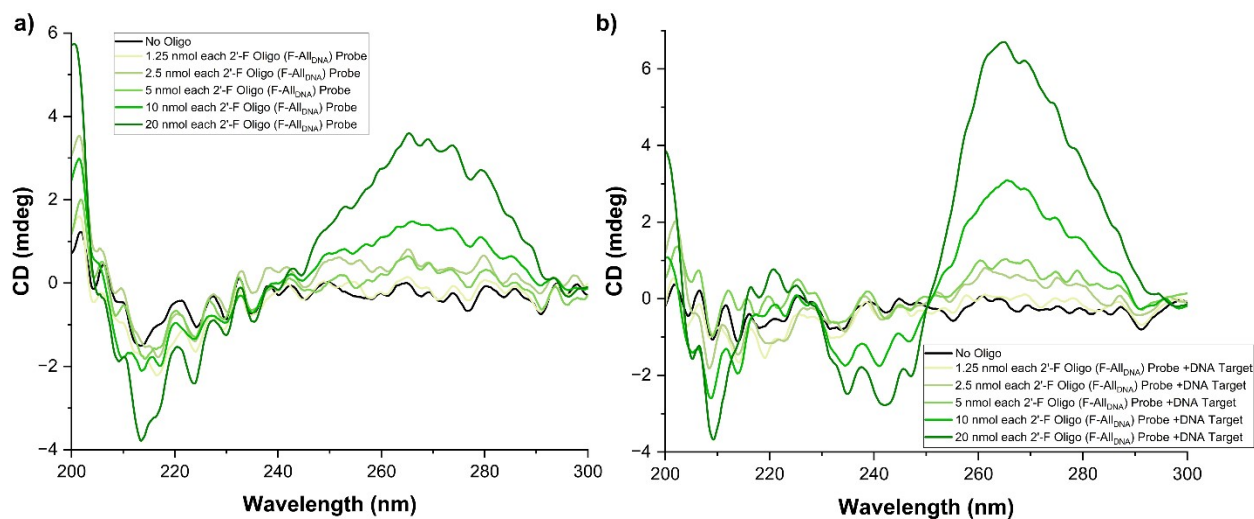

**Figure S8.** CD spectra for samples from Sensitivity Study I – Equal Molar Amounts of Probe and Target showing full range of concentrations tested (0-20 nmol) for a) ss2'-F Oligo (F-All<sub>DNA</sub>) and b) ds2'-F Oligo (F-All<sub>DNA</sub>)

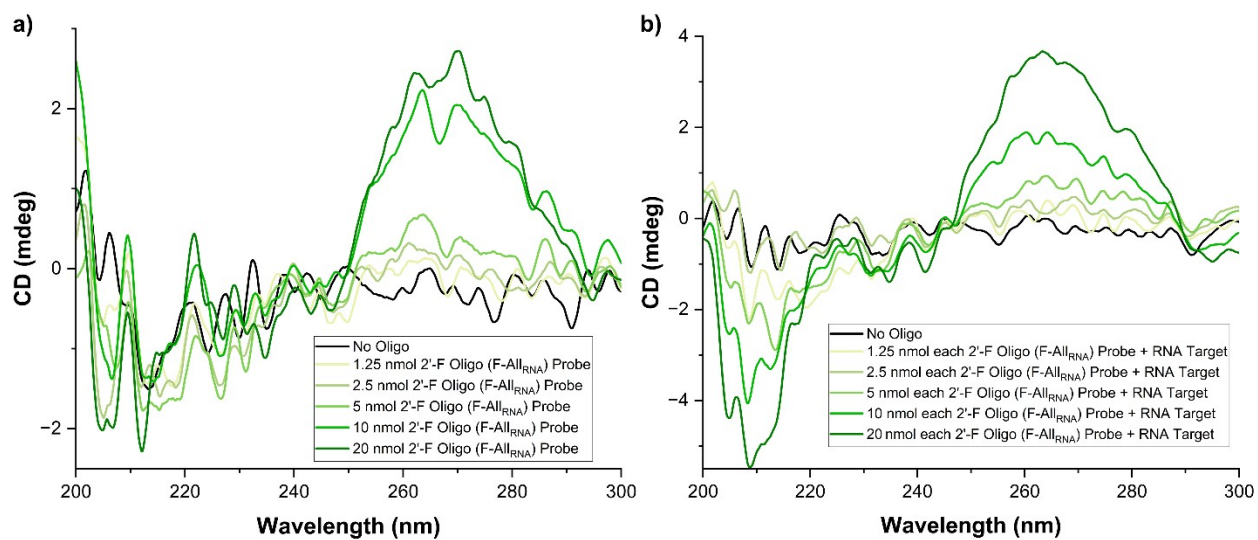

**Figure S9.** CD spectra for samples from Sensitivity Study I – Equal Molar Amounts of Probe and Target showing full range of concentrations tested (0-20 nmol) for a) ss2'-F Oligo (F-All<sub>RNA</sub>) and b) ds2'-F Oligo (F-All<sub>RNA</sub>)

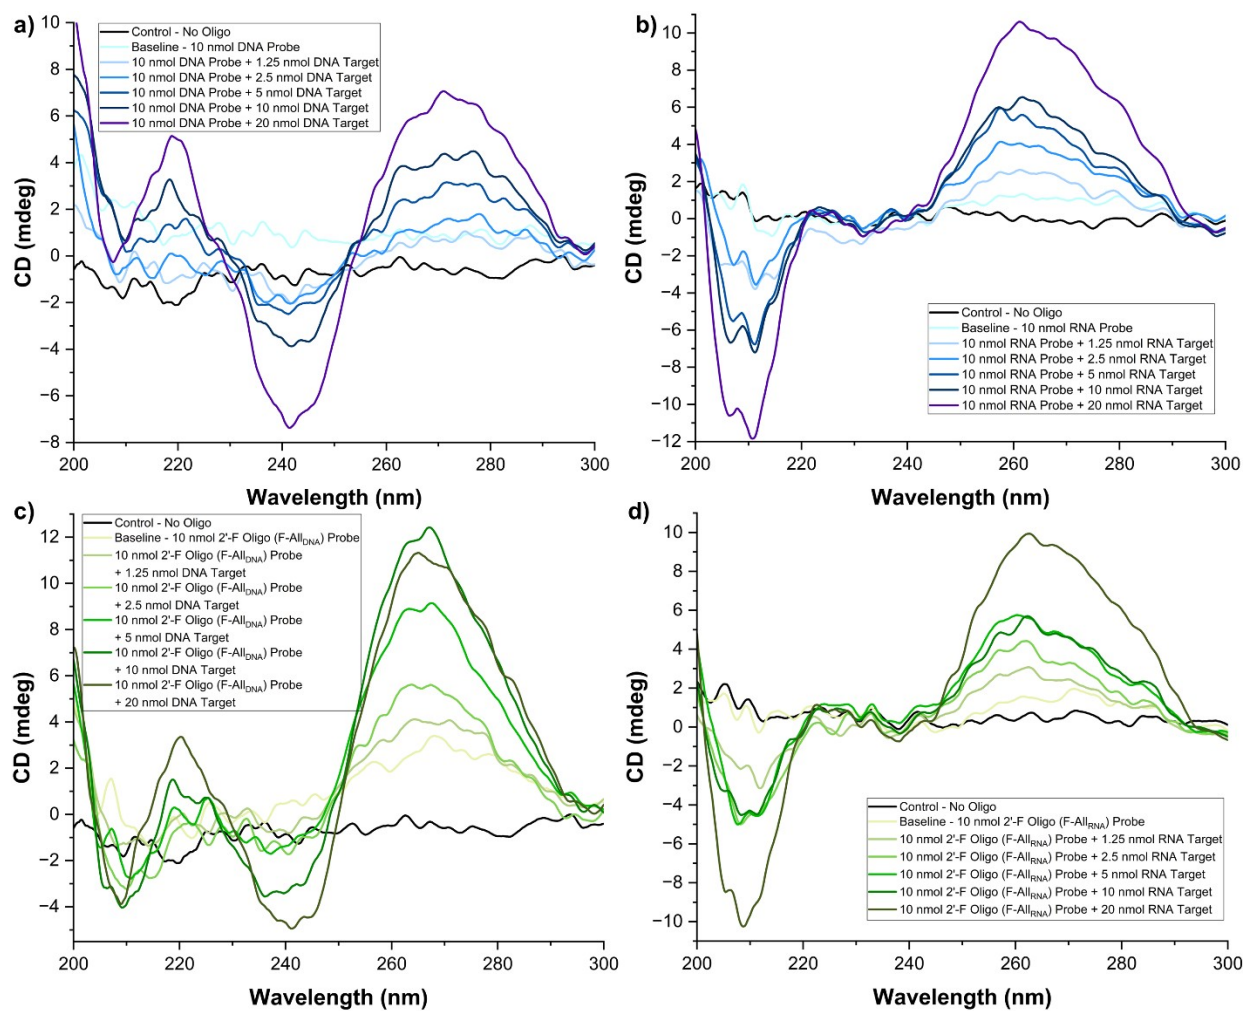

**Figure S10.** CD Spectra of a) DNA Sensitivity Study, b) RNA Sensitivity Study, c) 2'-F Oligo (F-All<sub>DNA</sub>)/DNA Target, and d) 2'-F Oligo (F-All<sub>RNA</sub>)/RNA Target Sensitivity Study with constant Probe and changing Target Sequence amounts.

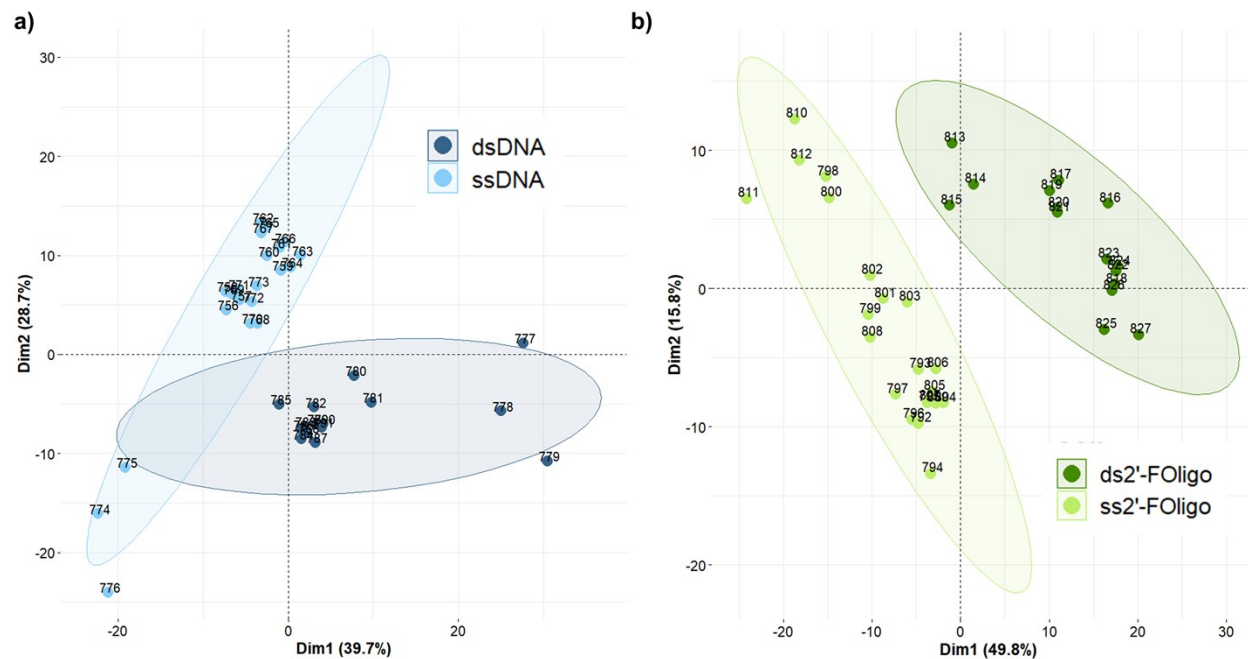

**Figure S11.** PCA of ss and ds a) DNA and b) 2'-F Oligo (F-All<sub>DNA</sub>) for Sensitivity Studies with Constant Probe and Varying Target Sequence Concentrations. PCAs include all samples containing 1.25-20 nmol of target sequence; CD response from 230-290 nm was used for PCA.

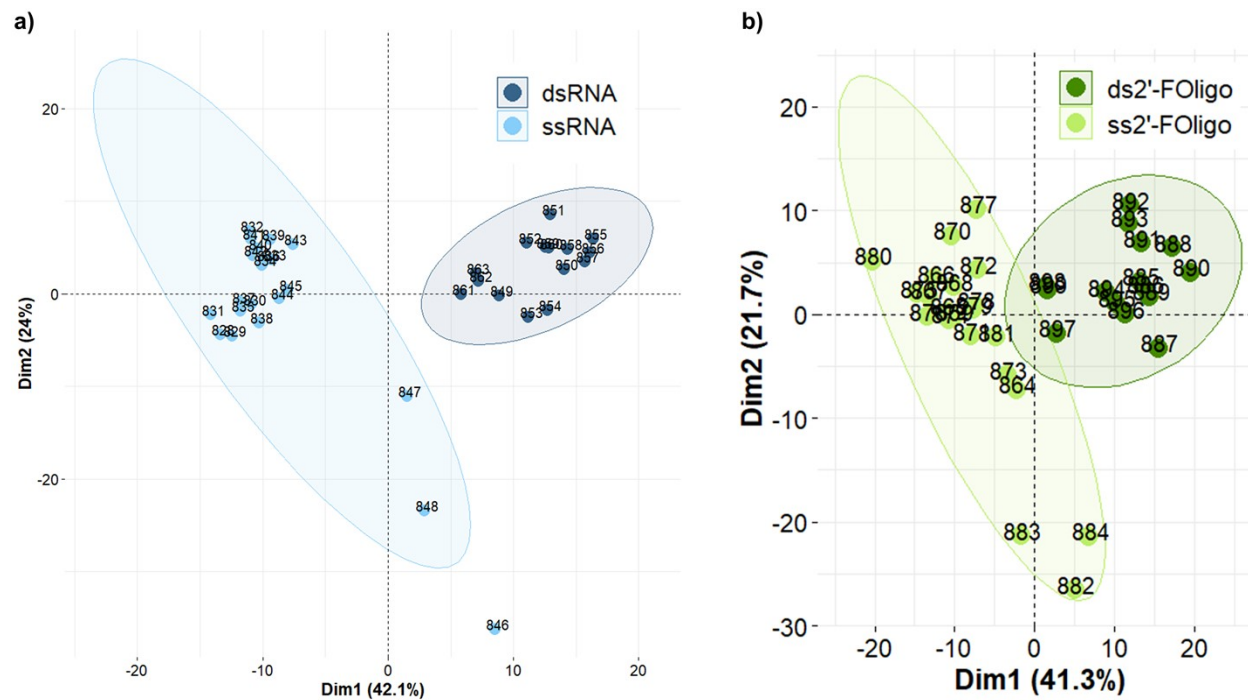

**Figure S12.** PCA of ss and ds a) RNA and b) 2'-F Oligo (F-All<sub>RNA</sub>) for Sensitivity Studies with Constant Probe and Varying Target Sequence Concentrations. PCAs include all samples containing 1.25-20 nmol of target sequence; CD response from 230-290 nm was used for PCA.

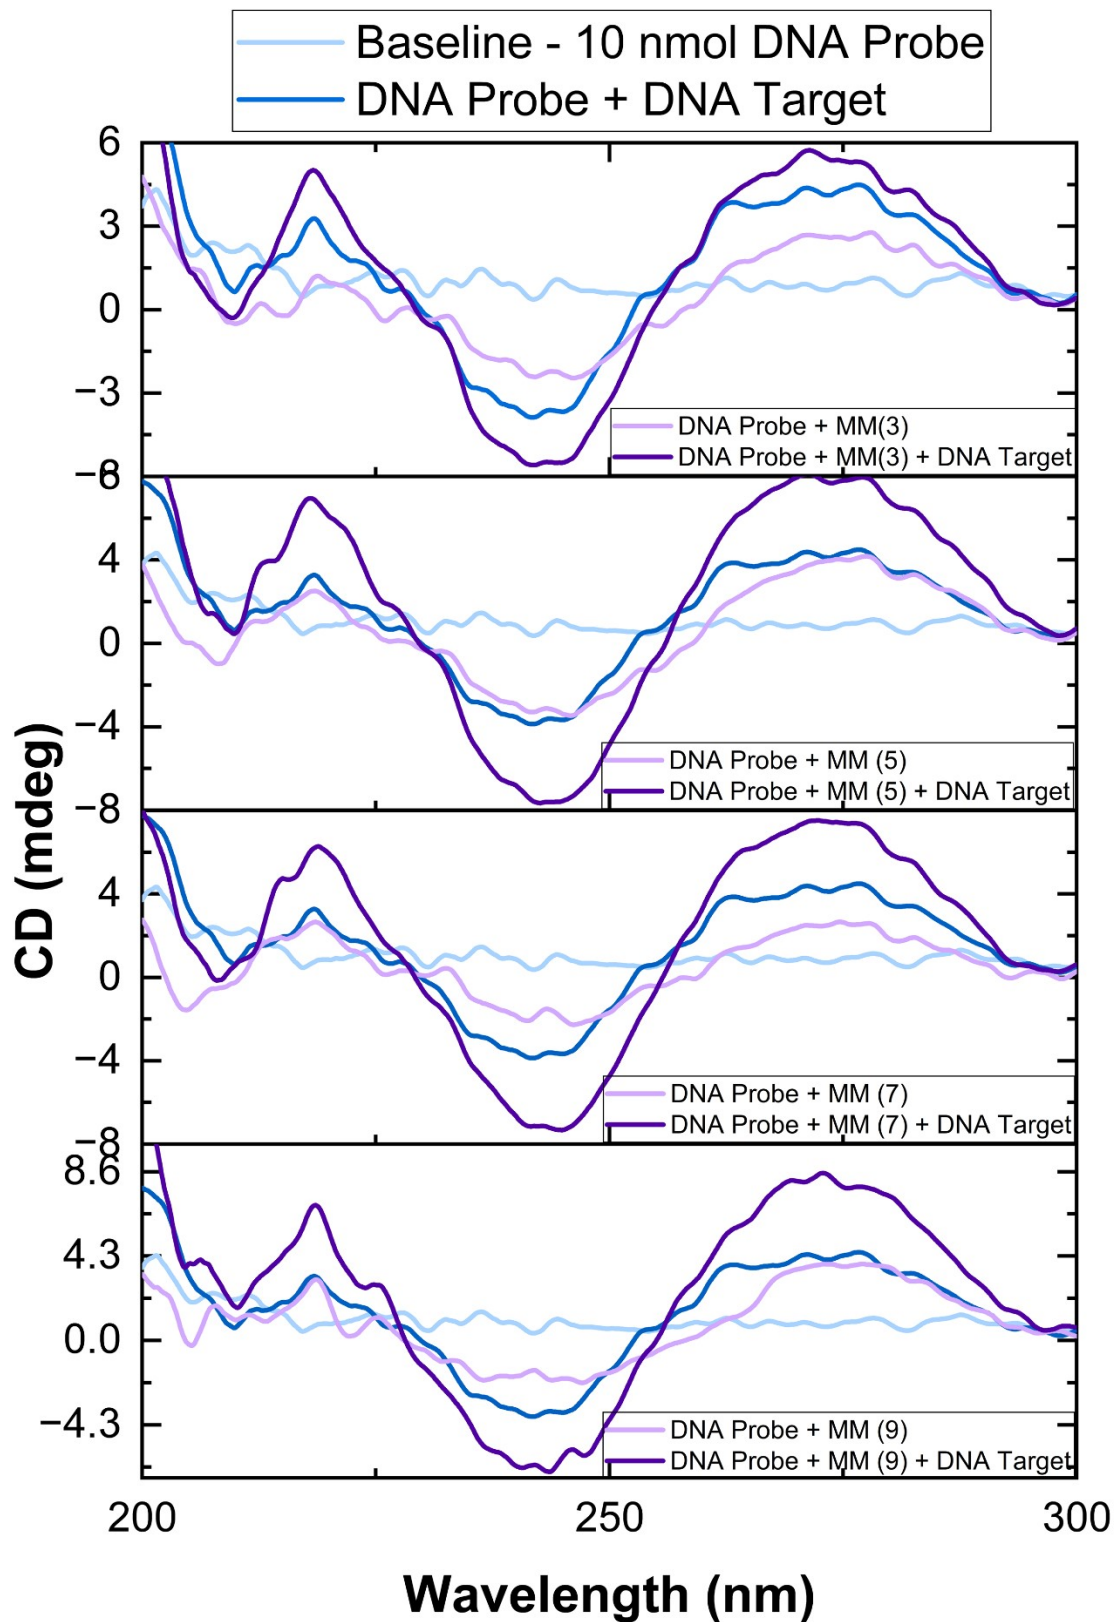

**Figure S13.** CD spectra for Mismatch Discrimination Threshold Study involving mixtures containing targets with 3, 5, 7 and 9 mismatches (MM3-9).

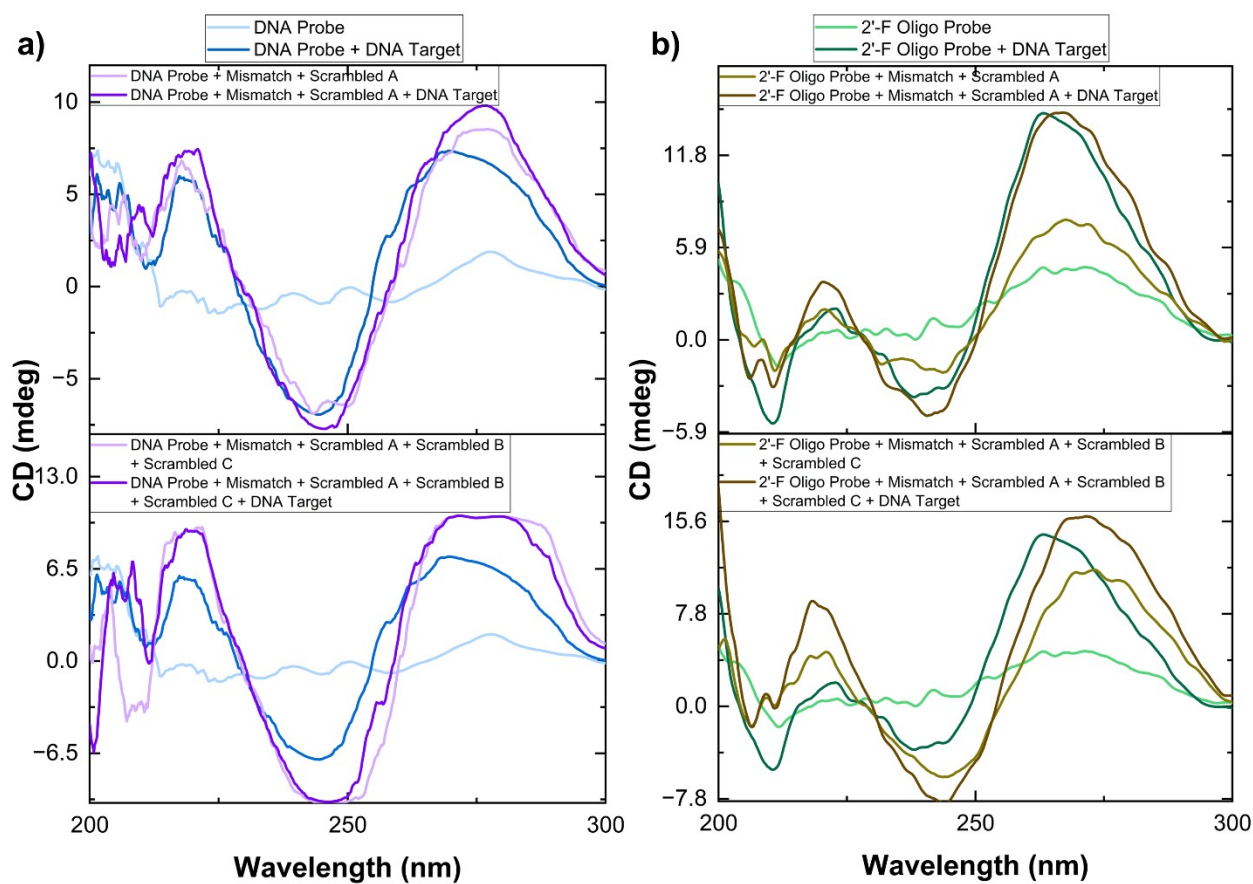

**Figure S14.** CD spectra of the DNA hydrogels and 2'-F Oligo hydrogels tested during the specificity study. 2'-F Oligo corresponds to the 2'-F Oligo (F-ALL<sub>DNA</sub>) sequence. Spectra are compared to Probe strands and a Probe/Target duplex, represented in light blue and dark blue for DNA and light green and dark green for 2'-F Oligo, respectively. CD Spectra in a) and b) represent samples with multiple non-complementary sequences.
